# Supplementary material for: The role of endoplasmic reticulum aminopeptidase 2 in modulating immune detection of choriocarcinoma
Source: PubMed Central journal article supplement — Biol Reprod. 2018 Jan 9;98(3):309–22. doi: 10.1093/biolre/ioy001 (PMC5939618; doi:10.1093/biolre/ioy001), 2018-01-09
Supplement: ioy001_supp.pdf [file ioy001_supp.pdf]

Supplemental Table III

| <b>Antibody</b>                 | <b>Company</b>  | <b>Catalog Number</b> | <b>RRID</b> |
|---------------------------------|-----------------|-----------------------|-------------|
| <b>ERAP2</b>                    | R and D Systems | BAF3830               | AB_2246533  |
| <b>HLA-C</b>                    | Abcam           | Ab126722              | AB_11130175 |
| <b><math>\beta</math>-actin</b> | Cell Signaling  | 4967L                 | AB_330288   |
| <b>E-cadherin</b>               | Thermo Fisher   | 13-1700               | AB_2633003  |
| <b>CD3</b>                      | BioLegend       | 344840                | AB_2572114  |
| <b>CD3</b>                      | BioLegend       | 300306                | AB_314042   |
| <b>CD8</b>                      | BioLegend       | 344708                | AB_1967149  |
| <b>CD56</b>                     | BioLegend       | 318306                | AB_604101   |
| <b>CD69</b>                     | BioLegend       | 310910                | AB_314845   |
| <b>CD154</b>                    | BioLegend       | 310824                | AB_2562721  |
| <b>CD11a</b>                    | BioLegend       | 301220                | AB_2561769  |
